# Supplementary material for: The Allometry of Bee Proboscis Length and Its Uses in Ecology
Source: PLoS One. 2016 Mar 17;11(3):e0151482. doi: 10.1371/journal.pone.0151482 (PMC4795761; doi:10.1371/journal.pone.0151482)
Supplement: S3 Table — Predictor variables were IT and sex. Response variables were either glossa, prementum and proboscis length. (XLSX) [file pone.0151482.s005.xlsx]

## Sheet: TableS3_JG
Genus	species	sample size	R2_glossa	p value glossa	R2_prementum	p value prementum	R2_proboscis	p value proboscis
Bombus	impatiens	29	0.605	<0.001	0.958	<0.001	0.768	<0.001
Megachile	xylocopoides	10	0.527	0.03	0.347	0.093	0.512	0.034
Megachile	mendica	28	0.519	<0.001	0.276	0.007	0.666	<0.001
Lasioglossum	pilosum	16	0.312	0.035	0.614	0.001	0.55	0.002
Bombus	bimaculatus	54	0.286	<0.001	0.858	<0.001	0.536	<0.001
Habropoda	laboriosa	32	0.247	0.006	0.026	0.258	0.246	0.006
Melissodes	denticulatus	24	0.207	0.034	0.432	0.001	0.42	0.001
Bombus	griseocollis	67	0.168	0.002	0.338	<0.001	0.411	<0.001
Agapostemon	virescens	16	0.119	0.173	0.298	0.04	0.197	0.095
Bombus	perplexus	17	0.05	0.322	0.981	<0.001	0.58	0.002
Lasioglossum	vierecki	11	0.031	0.361	0.123	0.242	0.229	0.145
Xylocopa	virginica	40	0.031	0.21	0.314	<0.001	0.009	0.321
Megachile	pugnata	10	0.027	0.296	0.201	0.109	0.475	0.017
Andrena	wilkella	15	0.003	0.389	0.564	0.003	-0.027	0.465
Lasioglossum	versatum	19	-0.004	0.401	0.469	0.002	0.256	0.036
Colletes	inaequalis	33	-0.053	0.82	0.182	0.019	0.189	0.016
Augochlora	pura	21	-0.058	0.646	0.417	0.003	0.089	0.167
Hoplitis	pilosifrons	23	-0.068	0.743	0.031	0.282	0.792	<0.001
Augochlorella	aurata	10	-0.099	0.672	-0.103	0.7	-0.092	0.638
Andrena	bradleyi	14	-0.15	0.861	0.783	<0.001	0.475	0.011
Andrena	imitatrix	10	-0.254	0.915	-0.099	0.578	-0.191	0.765
